# Supplementary material for: Prevalence and Correlates of Prescription Stimulant Use, Misuse, Use Disorders, and Motivations for Misuse Among Adults in the United States
Source: Atypon-hosted journal article supplement (doi:10.1176/appi.ajp.2018.17091048), 2018-04-16
Supplement: appi.ajp.2018.17091048.ds001.pdf [file appi.ajp.2018.17091048.ds001.pdf]

Data Supplement for Compton et al., Prevalence and Correlates of Prescription Stimulant Use, Misuse, Use Disorders, and Motivations for Misuse Among Adults in the United States. Am J Psychiatry (doi: 10.1176/appi.ajp.2018.17091048).

**TABLE S1. Twelve-Month Prevalence of Prescription Stimulant Use, Use Without Misuse, Misuse, and Use Disorders Among Adults in the U.S., N=102000 <sup>a</sup>**

|                                          | Any use of prescription stimulant<br>N=102000 <sup>a</sup> |             | Prescription stimulant use without misuse<br>N=102000 <sup>a</sup> |             | Prescription stimulant misuse<br>N=102000 <sup>a</sup> |           | Prescription stimulant use disorders<br>N=102000 <sup>a</sup> |           |
|------------------------------------------|------------------------------------------------------------|-------------|--------------------------------------------------------------------|-------------|--------------------------------------------------------|-----------|---------------------------------------------------------------|-----------|
|                                          | wtd estimate                                               | 95% CI      | wtd estimate                                                       | 95% CI      | wtd estimate                                           | 95% CI    | wtd estimate                                                  | 95% CI    |
| <b>Overall</b>                           |                                                            |             |                                                                    |             |                                                        |           |                                                               |           |
| Population estimate (number in millions) | 16.0                                                       | 15.47-16.53 | 11.0                                                               | 10.58-11.45 | 5.0                                                    | 4.74-5.26 | 0.4                                                           | 0.37-0.51 |
| Percentage estimate (%)                  | 6.6                                                        | 6.35-6.79   | 4.5                                                                | 4.34-4.70   | 2.1                                                    | 1.93-2.17 | 0.2                                                           | 0.16-0.20 |

<sup>a</sup> SAMHSA requires that any description of overall sample sizes based on the restricted-use data files be rounded to the nearest 100 to minimize potential disclosure risk. Wtd=weighted; CI=confidence interval.

**TABLE S2. Frequency Distributions of Prescription Stimulant Misuse in the Past Month Among U.S. Adult Prescription Stimulant Misusers by Sociodemographic Characteristics, Health Conditions, and Behavioral Health Status, N=3500 <sup>a</sup>**

| Characteristic                          | 0 day, n=2400 <sup>a</sup> |                    | 1-2 days, n=600 <sup>a</sup> |                    | 3-6 days, n=300 <sup>a</sup> |                   | 7+ days, n=200 <sup>a</sup> |                   |
|-----------------------------------------|----------------------------|--------------------|------------------------------|--------------------|------------------------------|-------------------|-----------------------------|-------------------|
|                                         | wtd %                      | 95% CI             | wtd %                        | 95% CI             | wtd %                        | 95% CI            | wtd %                       | 95% CI            |
| <b>Overall</b>                          | 68.3                       | 66.11-70.47        | 16.4                         | 14.73-18.07        | 9.1                          | 7.79-10.49        | 6.2                         | 4.95-7.39         |
| <b>Sociodemographic Characteristics</b> |                            |                    |                              |                    |                              |                   |                             |                   |
| <b>Year</b>                             |                            |                    |                              |                    |                              |                   |                             |                   |
| 2015+                                   | 67.9                       | 64.64-70.91        | 17.2                         | 14.87-19.87        | 8.7                          | 6.96-10.69        | 6.3                         | 4.82-8.12         |
| 2016                                    | 68.7                       | 65.47-71.73        | 15.7                         | 13.56-17.98        | 9.6                          | 7.71-11.88        | 6.1                         | 4.57-8.03         |
| <b>Age</b>                              |                            |                    |                              |                    |                              |                   |                             |                   |
| 18-29                                   | <b>70.6</b>                | <b>68.39-72.62</b> | 16.2                         | 14.53-18.09        | 8.8                          | 7.59-10.15        | <b>4.4</b>                  | <b>3.54-5.54</b>  |
| 30-49+                                  | 64.7                       | 59.91-69.24        | 17.1                         | 13.97-20.84        | 8.2                          | 5.88-11.30        | 10.0                        | 7.24-13.53        |
| ≥50                                     | 60.0                       | 46.09-72.47        | 15.3                         | 7.69-28.18         | 15.9                         | 8.23-28.23        | 8.8                         | 3.53-20.27        |
| <b>Sex</b>                              |                            |                    |                              |                    |                              |                   |                             |                   |
| Male                                    | 70.1                       | 67.35-72.25        | 16.2                         | 14.17-18.45        | <b>7.7</b>                   | <b>6.18-9.44</b>  | 6.0                         | 4.65-7.79         |
| Female+                                 | 66.0                       | 62.53-69.36        | 16.7                         | 14.23-19.40        | 11.0                         | 8.88-13.50        | 6.3                         | 4.70-8.50         |
| <b>Race/ethnicity</b>                   |                            |                    |                              |                    |                              |                   |                             |                   |
| NH white+                               | 67.1                       | 64.41-69.60        | 16.3                         | 14.49-18.35        | 9.9                          | 8.36-11.58        | 6.8                         | 5.42-8.39         |
| NH black                                | 74.7                       | 65.00-82.41        | 12.2                         | 7.41-19.38         | 9.0                          | 4.14-18.52        | 4.1                         | 1.86-8.87         |
| Hispanic                                | 72.3                       | 66.24-77.57        | 16.7                         | 12.51-21.84        | <b>5.6</b>                   | <b>3.65-8.62</b>  | 5.4                         | 3.16-9.22         |
| NH other                                | 71.4                       | 62.98-78.58        | 19.4                         | 13.32-27.39        | 7.2                          | 3.63-12.84        | <b>2.0</b>                  | <b>0.72-5.24</b>  |
| <b>Education</b>                        |                            |                    |                              |                    |                              |                   |                             |                   |
| < high school+                          | 54.9                       | 41.85-67.33        | 27.1                         | 16.53-41.18        | 7.6                          | 3.96-14.05        | 10.4                        | 4.01-24.22        |
| High school                             | 65.8                       | 59.00-72.00        | 16.3                         | 11.58-22.43        | 10.2                         | 6.88-14.96        | 7.7                         | 4.66-12.41        |
| Some college                            | 69.8                       | 65.28-73.87        | <b>14.9</b>                  | <b>12.05-18.24</b> | 8.1                          | 6.01-10.80        | 7.3                         | 5.06-10.37        |
| College graduate                        | 69.6                       | 62.89-75.58        | 19.2                         | 14.32-25.13        | 8.6                          | 5.26-13.64        | <b>2.7</b>                  | <b>1.35-5.27</b>  |
| <b>Health insurance</b>                 |                            |                    |                              |                    |                              |                   |                             |                   |
| Private only+                           | 68.9                       | 66.23-71.43        | 17.2                         | 15.25-19.24        | 9.0                          | 7.42-10.82        | 5.0                         | 3.85-6.42         |
| Uninsured                               | 68.6                       | 62.55-74.01        | 13.3                         | 9.53-18.22         | 10.0                         | 6.96-14.25        | 8.1                         | 5.17-12.52        |
| Medicaid only                           | 63.4                       | 57.04-69.27        | 18.7                         | 13.87-24.83        | 10.8                         | 7.48-15.24        | 7.1                         | 4.49-11.12        |
| Other                                   | 71.2                       | 61.84-79.00        | 11.2                         | 6.85-17.72         | 6.3                          | 3.86-10.03        | <b>11.4</b>                 | <b>5.95-20.67</b> |
| <b>Employment Status</b>                |                            |                    |                              |                    |                              |                   |                             |                   |
| Full-time+                              | 69.5                       | 66.50-72.33        | 16.3                         | 14.17-18.78        | 8.4                          | 6.80-10.23        | 5.8                         | 4.43-7.60         |
| Part-time                               | 68.1                       | 63.53-72.40        | 16.8                         | 13.67-20.51        | 10.1                         | 7.34-13.61        | 5.0                         | 3.11-7.96         |
| Disabled for work                       | 61.1                       | 43.42-76.32        | 14.0*                        | 5.52-31.02         | 10.2*                        | 3.65-25.26        | <b>14.8</b>                 | <b>7.14-28.05</b> |
| Unemployment                            | 71.7                       | 63.98-78.38        | 17.9                         | 12.55-24.76        | 6.8                          | 3.93-11.53        | 3.6                         | 1.66-7.69         |
| Other                                   | 64.0                       | 57.91-69.58        | 15.8                         | 12.11-20.42        | 11.6                         | 8.57-15.50        | 8.6                         | 5.35-13.63        |
| <b>Family Income</b>                    |                            |                    |                              |                    |                              |                   |                             |                   |
| <\$20,000                               | 65.7                       | 61.65-69.46        | 17.5                         | 14.47-21.01        | <b>11.2</b>                  | <b>8.85-14.15</b> | 5.6                         | 3.87-8.08         |
| \$20,000-\$49,999                       | 68.4                       | 64.32-72.21        | 14.1                         | 11.61-16.98        | 9.7                          | 7.36-12.75        | 7.9                         | 5.59-10.75        |
| \$50,000-\$74,999                       | 72.2                       | 66.30-77.37        | 16.2                         | 12.06-21.32        | 7.9                          | 5.22-11.72        | 3.8                         | 2.24-6.33         |
| ≥\$75,000+                              | 68.8                       | 64.74-72.50        | 17.3                         | 14.51-20.63        | 7.6                          | 5.67-10.15        | 6.3                         | 4.37-8.92         |
| <b>Marital Status</b>                   |                            |                    |                              |                    |                              |                   |                             |                   |
| Married+                                | 68.3                       | 59.90-75.68        | 18.7                         | 12.64-26.73        | 7.9                          | 4.26-14.04        | 5.2                         | 2.67-9.69         |
| Divorced/separated                      | 56.7                       | 44.71-67.92        | 12.2                         | 6.05-23.17         | 15.5                         | 7.63-28.87        | <b>15.6</b>                 | <b>8.05-28.11</b> |
| Never married                           | 69.5                       | 66.10-72.24        | 17.1                         | 14.65-19.91        | 8.1                          | 6.48-10.00        | 5.3                         | 3.94-7.07         |
| <b>Health Conditions</b>                |                            |                    |                              |                    |                              |                   |                             |                   |
| <b>Self-rated health</b>                |                            |                    |                              |                    |                              |                   |                             |                   |
| Excellent+                              | 67.9                       | 63.28-72.23        | 18.6                         | 15.29-22.39        | 8.0                          | 5.88-10.86        | 5.5                         | 3.48-8.55         |
| Very good                               | 70.0                       | 66.74-73.01        | 15.1                         | 12.83-17.77        | 9.8                          | 7.87-12.13        | 5.1                         | 3.78-6.85         |
| Good                                    | 70.0                       | 64.47-73.14        | 16.1                         | 12.89-19.95        | 7.5                          | 5.63-9.98         | 7.4                         | 5.11-10.60        |

|                                    |             |                    |             |                    |             |                    |             |                   |
|------------------------------------|-------------|--------------------|-------------|--------------------|-------------|--------------------|-------------|-------------------|
| Fair/poor                          | 59.2        | 50.65-67.30        | 17.8        | 12.57-24.65        | 13.3        | 7.97-21.30         | 9.7         | 5.86-15.53        |
| <b>No. PY ER visits</b>            |             |                    |             |                    |             |                    |             |                   |
| 0+                                 | 69.5        | 66.89-71.94        | 15.8        | 13.91-17.84        | 9.1         | 7.53-10.87         | 6.7         | 4.50-7.16         |
| 1                                  | 67.5        | 62.06-72.46        | 19.6        | 15.38-24.67        | 9.4         | 6.42-13.57         | 3.5         | 2.21-5.53         |
| 2                                  | 64.8        | 57.23-71.60        | 17.2        | 12.78-22.77        | 8.5         | 5.62-12.76         | 9.5         | 5.58-15.76        |
| ≥3                                 | 62.1        | 51.30-71.73        | 11.7        | 7.28-18.19         | 11.3        | 6.06-20.14         | <b>15.0</b> | <b>7.78-26.86</b> |
| <b>Hypertension</b>                |             |                    |             |                    |             |                    |             |                   |
| Yes                                | 67.0        | 55.87-76.53        | 12.6        | 7.06-21.60         | 12.6        | 6.43-23.07         | 7.8         | 4.17-14.09        |
| No+                                | 68.4        | 66.13-70.50        | 16.6        | 15.01-18.40        | 8.9         | 7.67-10.35         | 6.1         | 4.94-7.47         |
| <b>Heart Disease</b>               |             |                    |             |                    |             |                    |             |                   |
| Yes                                | <b>47.4</b> | <b>34.89-60.23</b> | <b>29.5</b> | <b>18.25-43.88</b> | 12.1        | 4.41-29.01         | 11.1        | 5.08-22.40        |
| No+                                | 69.1        | 66.90-71.26        | 15.8        | 14.26-17.51        | 9.1         | 7.83-10.44         | 6.0         | 4.88-7.36         |
| <b>Diabetes Mellitus</b>           |             |                    |             |                    |             |                    |             |                   |
| Yes                                | 77.2        | 63.84-86.66        | <b>7.4</b>  | <b>3.50-14.94</b>  | 9.8         | 4.18-21.22         | 5.6         | 1.67-17.23        |
| No+                                | 68.0        | 65.78-70.19        | 16.6        | 14.96-18.38        | 9.2         | 7.87-10.63         | 6.2         | 5.08-7.59         |
| <b>Asthma</b>                      |             |                    |             |                    |             |                    |             |                   |
| Yes                                | 68.7        | 62.53-74.35        | 15.0        | 11.28-19.57        | 9.5         | 6.56-13.58         | 6.8         | 4.16-10.19        |
| No+                                | 68.2        | 65.74-70.53        | 16.6        | 14.84-18.51        | 9.1         | 7.75-10.70         | 6.1         | 4.92-7.54         |
| <b>COPD</b>                        |             |                    |             |                    |             |                    |             |                   |
| Yes                                | 57.1        | 42.13-70.88        | 13.1        | 5.27-29.00         | 14.6        | 6.45-29.86         | <b>15.2</b> | <b>7.47-28.40</b> |
| No+                                | 68.6        | 66.37-70.79        | 16.5        | 14.85-18.22        | 9.0         | 7.73-10.45         | 5.9         | 4.80-7.27         |
| <b>Mental Health Problems</b>      |             |                    |             |                    |             |                    |             |                   |
| <b>Major depressive episode</b>    |             |                    |             |                    |             |                    |             |                   |
| Yes                                | 61.4        | 55.88-66.61        | 16.6        | 13.10-20.82        | 11.7        | 8.38-15.99         | <b>10.4</b> | <b>7.14-14.80</b> |
| No+                                | 69.9        | 67.36-72.32        | 16.4        | 14.61-18.42        | 8.4         | 7.01-9.96          | 5.3         | 4.22-6.65         |
| <b>Suicide ideation</b>            |             |                    |             |                    |             |                    |             |                   |
| Yes                                | 63.4        | 57.70-68.71        | 15.6        | 12.01-19.96        | <b>13.3</b> | <b>9.42-18.32</b>  | 7.8         | 5.21-11.51        |
| No+                                | 69.1        | 66.68-71.47        | 16.5        | 14.74-18.52        | 8.4         | 7.17-9.90          | 5.9         | 4.71-7.35         |
| <b>Substance Use Problems</b>      |             |                    |             |                    |             |                    |             |                   |
| <b>Tobacco use &amp; disorder</b>  |             |                    |             |                    |             |                    |             |                   |
| PM nicotine dependence             | <b>63.2</b> | <b>58.54-67.69</b> | 16.1        | 12.88-19.99        | 11.7        | 9.05-14.97         | 9.0         | 6.59-12.07        |
| PY tobacco use                     | 68.8        | 65.73-71.77        | <b>18.2</b> | <b>15.93-20.78</b> | 8.3         | 6.86-9.91          | 4.7         | 3.54-6.18         |
| Lifetime use, but no PY use        | 70.6        | 65.20-75.50        | 14.8        | 11.22-19.39        | 9.0         | 6.05-13.08         | 5.6         | 3.24-9.45         |
| Never tobacco use+                 | 75.1        | 66.24-82.22        | 10.2        | 6.42-15.69         | 6.8         | 3.21-13.90         | 8.0         | 3.71-16.28        |
| <b>Alcohol use &amp; disorder</b>  |             |                    |             |                    |             |                    |             |                   |
| PY alcohol use disorder            | 63.2        | 59.22-67.02        | 19.3        | 16.40-22.65        | 10.6        | 8.42-13.32         | 6.8         | 4.97-9.33         |
| PY use, but no use disorder        | 71.3        | 68.67-73.80        | 15.1        | 13.15-17.27        | 7.9         | 6.49-9.49          | 5.8         | 4.45-7.39         |
| Lifetime use, but no PY use        | 61.2        | 46.59-74.01        | 14.3        | 6.74-27.74         | 16.1        | 8.09-29.39         | *           | *                 |
| Never alcohol use+                 | 71.6        | 51.74-85.51        | 15.4        | 6.91-30.98         | *           | *                  | *           | *                 |
| <b>Cannabis use &amp; disorder</b> |             |                    |             |                    |             |                    |             |                   |
| PY cannabis use disorder           | <b>60.3</b> | <b>54.21-66.12</b> | 20.1        | 15.51-25.55        | <b>11.2</b> | <b>8.14-15.25</b>  | 8.4         | 5.47-12.70        |
| PY use, but no use disorder        | 67.9        | 64.96-70.78        | 17.5        | 15.35-19.84        | <b>9.5</b>  | <b>7.94-11.38</b>  | 5.1         | 3.85-6.61         |
| Lifetime use, but no PY use        | 71.7        | 66.51-76.36        | 11.4        | 8.42-15.33         | <b>9.1</b>  | <b>6.25-12.94</b>  | 7.8         | 5.23-11.57        |
| Never cannabis use+                | 74.2        | 65.63-81.19        | 16.9        | 11.48-24.28        | 3.2         | 1.38-7.10          | 5.7         | 2.56-12.33        |
| <b>Cocaine use &amp; disorder</b>  |             |                    |             |                    |             |                    |             |                   |
| PY cocaine use disorder            | <b>46.4</b> | <b>35.12-58.04</b> | 18.4        | 12.07-27.13        | <b>24.3</b> | <b>14.24-38.34</b> | <b>10.9</b> | <b>5.64-19.89</b> |
| PY use, but no use disorder        | <b>57.2</b> | <b>52.66-61.69</b> | <b>24.2</b> | <b>20.60-28.19</b> | <b>11.6</b> | <b>9.10-14.70</b>  | 7.0         | 4.87-9.86         |
| Lifetime use, but no PY use        | <b>68.5</b> | <b>64.17-72.51</b> | 15.5        | 12.46-19.07        | 8.7         | 6.39-11.76         | 7.3         | 5.23-10.16        |
| Never cocaine use+                 | 75.7        | 72.76-78.49        | 12.8        | 10.77-15.09        | 6.8         | 5.38-8.64          | 4.7         | 3.25-6.61         |

|                                                           |             |                    |             |                    |              |                    |             |                   |
|-----------------------------------------------------------|-------------|--------------------|-------------|--------------------|--------------|--------------------|-------------|-------------------|
| <b>Heroin use &amp; disorder</b>                          |             |                    |             |                    |              |                    |             |                   |
| PY heroin use or use disorder                             | 56.7        | 47.97-70.37        | 10.6        | 5.89-18.19         | 15.5         | 8.21-27.33         | <b>14.3</b> | <b>8.39-23.24</b> |
| Lifetime use, but no PY use                               | <b>55.9</b> | <b>45.71-65.56</b> | <b>26.6</b> | <b>18.17-37.28</b> | 7.7          | 4.42-13.17         | 9.8         | 5.30-17.29        |
| Never heroin use+                                         | 69.5        | 67.25-71.70        | 15.9        | 14.31-17.72        | 9.0          | 7.63-10.51         | 5.6         | 4.47-6.93         |
| <b>Hallucinogen use &amp; disorder</b>                    |             |                    |             |                    |              |                    |             |                   |
| PY use/use disorder                                       | <b>59.4</b> | <b>55.36-63.32</b> | <b>21.7</b> | <b>18.68-25.09</b> | <b>12.9</b>  | <b>10.38-15.97</b> | 6.0         | 4.28-8.24         |
| Lifetime use, but no PY use                               | 69.3        | 65.67-72.77        | 15.0        | 12.37-17.95        | 7.2          | 5.53-9.26          | <b>8.5</b>  | <b>6.50-11.16</b> |
| Never hallucinogen use+                                   | 73.6        | 69.96-77.00        | 14.0        | 11.56-16.86        | 8.3          | 6.35-10.86         | 4.0         | 2.63-6.14         |
| <b>Inhalant use &amp; disorder</b>                        |             |                    |             |                    |              |                    |             |                   |
| PY inhalant use/use disorder                              | <b>55.9</b> | <b>47.15-64.21</b> | <b>23.4</b> | <b>16.25-32.47</b> | 9.3          | 5.52-15.32         | <b>11.4</b> | <b>6.48-19.38</b> |
| Lifetime use, but no PY use                               | <b>65.1</b> | <b>60.83-69.19</b> | 16.5        | 13.46-20.02        | <b>11.52</b> | <b>8.98-14.64</b>  | 6.9         | 4.93-9.54         |
| Never inhalant use+                                       | 70.6        | 68.10-73.06        | 15.8        | 13.87-17.94        | 8.1          | 6.75-9.75          | 5.4         | 4.15-7.10         |
| <b>Rx tranquilizer/sedative misuse &amp; use disorder</b> |             |                    |             |                    |              |                    |             |                   |
| PY misuse & use disorder                                  | <b>56.5</b> | <b>52.20-60.63</b> | <b>20.9</b> | <b>17.89-24.19</b> | <b>12.9</b>  | <b>10.19-16.21</b> | <b>9.8</b>  | <b>7.58-12.50</b> |
| Lifetime misuse, but no PY misuse                         | 69.7        | 62.56-76.01        | 16.5        | 11.88-22.45        | 8.5          | 5.16-13.82         | 5.3         | 2.54-10.53        |
| Never misuse+                                             | 73.6        | 70.93-76.13        | 14.3        | 12.31-16.53        | 7.5          | 6.11-9.11          | 4.6         | 3.40-6.27         |
| <b>Rx opioid misuse/use disorder</b>                      |             |                    |             |                    |              |                    |             |                   |
| PY misuse & use disorder                                  | <b>60.6</b> | <b>56.38-64.58</b> | 17.3        | 14.53-20.45        | <b>12.1</b>  | <b>9.76-14.92</b>  | <b>10.1</b> | <b>7.66-13.1</b>  |
| Lifetime misuse, but no PY misuse                         | 71.7        | 66.45-76.40        | 15.3        | 11.80-19.64        | 9.0          | 6.29-12.63         | 4.0         | 2.15-7.43         |
| Never misuse+                                             | 72.3        | 69.14-75.30        | 16.2        | 13.89-18.80        | 7.2          | 5.59-9.17          | 4.3         | 3.13-5.89         |

<sup>a</sup> SAMHSA requires that any description of overall sample sizes based on the restricted-use data files be rounded to the nearest 100 to minimize potential disclosure risk. N=overall unweighted sample size; n=unweighted sample size for each column; Wtd=weighted; CI=confidence interval; NH=Non-Hispanic; Each bolded estimate is significantly different ( $p < 0.05$ ) from the corresponding reference group (with + sign) within each column. \*: Estimate suppressed due to low statistical precision.
