# Supplementary material for: Prevalence and Correlates of Prescription Stimulant Use, Misuse, Use Disorders, and Motivations for Misuse Among Adults in the United States
Source: Atypon-hosted journal article supplement (doi:10.1176/appi.ajp.2018.17091048), 2018-04-16
Supplement: correction.pdf [file correction.pdf]

## Correction

When the article “Prevalence and Correlates of Prescription Stimulant Use, Misuse, Use Disorders, and Motivations for Misuse Among Adults in the United States,” by Wilson M. Compton et al. (doi:10.1176/appi.ajp.2018.17091048) was published online on April 16, 2018, the first sentence of the Conclusions section of the abstract misstated an aspect of the study findings. The sentence should read “Approximately 16.0 million U.S. adults used prescription stimulants in the preceding year (annual average), 5.0 million misused prescription stimulants, and 0.4 million had use disorders.” The article was reposted with the correct wording on May 30, 2018.
